## **The erratic and contingent progression of research on territoriality: a case study.**

**Ambika Kamath<sup>1,2</sup> and Jonathan Losos<sup>1</sup>**

1. Department of Organismic and Evolutionary Biology and the Museum of Comparative Zoology,  
Harvard University, 26 Oxford Street, Cambridge, MA, 02138, USA.

2. [ambikamath@gmail.com](mailto:ambikamath@gmail.com)

### ABSTRACT

Our understanding of animal mating systems has changed dramatically with the advent of molecular methods to determine individuals' reproductive success. But why are older behavioral descriptions and newer genetic descriptions of mating systems often seemingly inconsistent? We argue that a potentially important reason for such inconsistencies is a research trajectory rooted in early studies that were equivocal and overreaching, followed by studies that accepted earlier conclusions at face value and assumed, rather than tested, key ideas about animal mating systems. We illustrate our argument using *Anolis* lizards, whose social behavior has been studied for nearly a century. A dominant view emerging from this behavioral research was that anoles display strict territorial polygyny, where females mate with just the one male in whose territory they reside. However, all genetic evidence suggests that females frequently mate with multiple males. We trace this mismatch to early studies that concluded that anoles are territorial based on limited data. Subsequent research assumed territoriality implicitly or explicitly, resulting in studies that were unlikely to uncover or consider important any evidence of anoles' departures from strict territorial polygyny. Thus, descriptions of anole behavior were largely led away from predicting a pattern of female multiple mating. We end by considering the broader implications of such erratic trajectories for the study of animal mating systems, and posit that precise definitions, renewed attention to natural history, and explicitly questioning assumptions made while collecting behavioral observations will allow us to move towards a fuller understanding of animal mating systems.

**KEY WORDS:** *Anolis*, history, mating system, territorial, polygyny.

## 1 INTRODUCTION

2 Variation among species in social organization and mating system has long been of interest to  
3 naturalists and evolutionary biologists. Why are some species monogamous, others polygynous, and  
4 yet others polyandrous? Why do some species exhibit a wide range of reproductive and social  
5 behavior? Understanding the selective pressures driving such variation requires quantifying the  
6 extent to which different behaviors lead to reproductive success. For decades, behavioral ecologists  
7 could not quantify reproductive success directly, and used proxies such as the number of observed  
8 mates or offspring produced (Emlen and Oring 1977; Klug 2011). Inferring reproductive success  
9 from such proxies involved making assumptions about species' biology. For example, using the  
10 number of mates as a proxy for male fitness meant assuming that females do not vary in fecundity,  
11 and using the number of eggs in the nest of a breeding pair as a proxy for the male's fitness meant  
12 assuming that the female does not engage in extra pair copulations or that occasional extra pair  
13 mates are unlikely to sire offspring.

14 However, in the last three decades, the advent of molecular means of assessing parentage has  
15 allowed direct and precise measurements of reproductive fitness, enabling novel insight into the  
16 complex landscapes of sexual selection acting both before and after copulation (e.g. Coltman et al.  
17 2002; Birkhead 2010; Fisher and Hoekstra 2010). In many cases, these molecular measures have  
18 demonstrated that what we thought we knew about reproductive success was mistaken (e.g. Avise et  
19 al. 2002; Griffith et al. 2002; Uller and Olsson 2008; Boomsma et al. 2009). Specifically, biologists  
20 have discovered that the assumptions linking behavioral proxies to reproductive success were often  
21 not met. For example, females can vary in fecundity (Clutton-Brock 2009), may mate outside of  
22 observed social bonds (Griffith et al. 2002), and can store sperm, allowing for cryptic post-  
23 copulatory female mate choice (reviewed in Eberhard 1996; Orr and Brennan 2015). In such cases,  
24 the reason for the mismatch between behavioral and genetic descriptions of mating systems is that,  
25 despite intensive field studies, researchers were yet to observe important components of a  
26 population's mating system.

27 In this paper, we argue that mismatches between behavioral and genetic descriptions of mating  
28 systems can arise not only from undiscovered biology but also from the erratic and contingent  
29 progression of scientific research. In such a progression, poorly-supported conclusions from the  
30 earliest studies are inadvertently reified by later researchers, who, without examining the evidence for

31 earlier conclusions, assume rather than test key hypotheses. Breaking away from such a progression  
32 of research is not inevitable, because it requires reinvestigating ideas believed to be true.  
33 Consequently, relatively unsupported corpora of knowledge about species' social behavior and  
34 mating systems may remain undiagnosed.

35 We illustrate our argument using *Anolis* lizards, a model system for evolutionary ecology in which  
36 social behavior and mating systems have been studied for nearly a century (reviewed in Losos 2009).  
37 These decades of behavioral research yielded the near-unanimous conclusion that anoles are  
38 territorial and polygynous. In a chapter reviewing behavioral descriptions of *Anolis* mating systems,  
39 Losos (2009) concluded that “as a rule, male anoles are highly territorial.” Elsewhere, some of the  
40 best studied species in this genus have been described, based on behavioral observations, as  
41 matching “the paradigm of a territorial polygynous species” (Schoener and Schoener 1982). In what  
42 remains one of the best studies of anole social behavior in the wild, Rand (1967a), described their  
43 mating system thus:

44         “...the lizards live together more or less permanently and the females usually mate with a  
45         single male (the male with the one or more females that have home ranges within his).”

46 Tokarz (1998), describing the prevailing views from behavioral data on anole mating systems, said  
47 that it is “generally believed that in territorial species of lizards, females that reside within a given  
48 male's territory would have relatively few opportunities to mate with more than one male.” Stamps  
49 (1995) summarized their mating system as follows:

50         “During the breeding season, male anoles defend territories that enclose the home ranges of  
51         adult females, and defend these mating territories against conspecific males. Although DNA  
52         paternity studies are not yet available for anoles, males probably father most of the  
53         hatchlings produced by the females within their territory.”

54 Together, these quotes help to delineate the prevailing view of anole spatial and social organization  
55 based on behavioral data. Under this view, which we describe as “strict territorial polygyny” and  
56 illustrate in Fig. 1, males have the potential to mate with one or more females within their territory,  
57 but females mate with only the one male in whose territory they are contained. If these territories are  
58 maintained for the duration of the breeding season or longer, as suggested by Rand (1967a), then all  
59 of a female's offspring are expected to be sired by a single male.

## Territorial Polygyny in *Anolis* Lizards

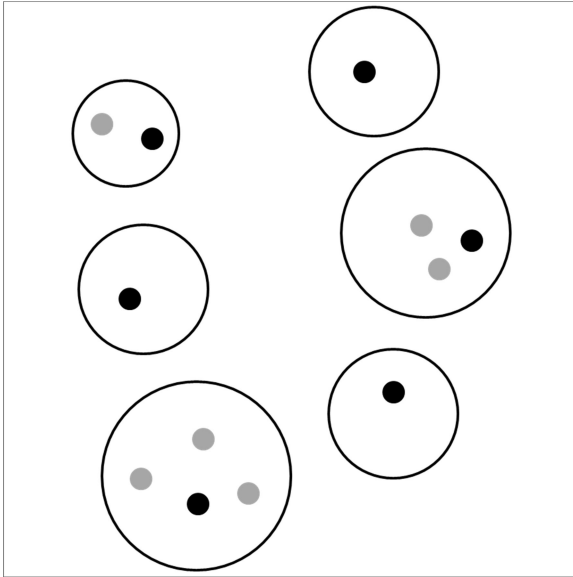

Figure 1. A pictorial representation of strict territorial polygyny. i.e. males (black) may mate with multiple females (grey) within their territories (black circles), but females mate with just the one male in whose territory they are contained. If this spatial organization is maintained for the duration of the breeding season, then all of a female's offspring will be sired by just one male.

60 However, all the genetic evidence collected subsequent to these descriptions indicates that, as in  
61 many other reptiles and amphibians (Uller and Olsson 2008), females anoles' offspring are  
62 frequently sired by multiple males; therefore, the prediction about strict territorial polygyny in *Anolis*  
63 lizards was not met (reviewed below; Passek 2002; Calsbeek et al. 2007; Johnson 2007; Harrison  
64 2014). Quite to the contrary, female multiple mating is common in anoles, calling into question the  
65 behavioral descriptions predicting that female anoles will mate with just one male. Nevertheless,  
66 anoles continue to be described as territorial and polygynous (e.g. Calsbeek et al. 2007; Losos 2009;  
67 Simon 2011; Flanagan and Bevier 2014; Bush et al. 2016).

68 At the heart of this discrepancy between behavioral predictions and genetic data on female mating  
69 patterns in anoles is the concept of territoriality. Though territoriality is central to the behavioral  
70 descriptions of mating systems in many animals (Emlen and Oring 1977; Fitzpatrick and Wellington  
71 1982; Lott 1984), the term itself is fraught with inconsistency and imprecision across different  
72 studies. Most often, the term "territorial" is used to describe individuals that defend an exclusive  
73 area in a fixed spatial location (Tinbergen 1957; Stamps 1977; Martins 1994; Maher and Lott 1995),  
74 indicating that the definition of territoriality incorporates two features: site fidelity (the tendency of  
75 an individual to remain in or return to a fixed spatial location) and exclusivity (the tendency of an  
76 individual to exclude other individuals, particularly conspecifics of the same sex, from the area they  
77 occupy). Under the strictest interpretation of territoriality in *Anolis* (Fig. 1), females mate with just  
78 one male; however, more relaxed interpretations of territoriality incorporating some variation in site  
79 fidelity, exclusivity, or both, can be consistent with female multiple mating. Imprecise and changing

80 interpretations of territoriality across studies of anole social behavior may therefore have played an  
81 important role in producing the mismatch between behavioral and genetic descriptions of their  
82 mating system.

83 In this paper, we trace the evidence for territoriality, and for the relationship between territoriality  
84 and the expectation of polygynous mating patterns, in *Anolis* lizards. To this end, we examine nearly  
85 a century of research on their mating systems (see the Appendix for a list of papers considered). Our  
86 goal is to discern *how* we came to expect that female anoles mate with just one male when in fact  
87 they frequently mate with multiple males. Specifically, we examine if this research was somehow set  
88 on a path towards reifying a particular conception of territoriality that is inconsistent with  
89 widespread female multiple mating, leading to the erroneous expectation that anoles show strict  
90 territorial polygyny (Fig. 1). Throughout, we highlight whether the definitions and interpretations of  
91 territoriality employed by different researchers include site fidelity, exclusivity, or both; further, we  
92 pay attention to whether variation in site fidelity and exclusivity that could have explained female  
93 multiple mating remained undetected or was otherwise ignored.

94 We show that current ideas about anole social structure originated in studies whose scope and  
95 content is not commensurate with the weight they currently bear. These equivocal demonstrations  
96 of territorial behavior in early studies were seemingly taken at face value by later researchers, whose  
97 research included implicit and explicit assumptions about the existence of territoriality.  
98 Consequently, the design of later studies was often such that these studies were unable to detect  
99 variation in site fidelity and exclusivity. Moreover, even when later researchers found evidence for  
100 departures from strict territorial polygyny, this evidence was often deemphasized or ignored during  
101 data analysis and in the discussion of results. Given that mismatches between behavioral and genetic  
102 descriptions of mating systems are taxonomically widespread, our historical investigation reveals  
103 concerns that are likely not unique to *Anolis*. Indeed, the extent to which such erratic progressions of  
104 research afflict our understanding of animal behavior remains entirely unknown, and we urge  
105 researchers studying other organisms or questions to consider if the issues we highlight might apply  
106 to their fields of study as well. We conclude by considering the broader consequences of our case  
107 study for future research on animal mating systems.

## 108 THE EARLIEST STUDIES OF ANOLE SOCIAL INTERACTIONS

109 The first study of lizard mating systems—Noble and Bradley (1933)—combined a review of existing  
110 natural history literature with laboratory observations on a taxonomically wide variety of lizard  
111 species. Both the lizards' survival (“less than a year” for five species of *Anolis*, which typically live for  
112 at least a year even in the wild; Losos 2009) and their behavior indicated that the conditions under  
113 which these lizards were housed were likely stressful. Nearly half of all instances of copulatory  
114 behavior observed in *Anolis* by Noble and Bradley (1933) was between males. While this behavior  
115 was recognized as unusual, it was nonetheless interpreted as supporting territoriality—because  
116 lizards frequently engage in male-male copulations only in the lab, in nature these male-male  
117 copulations must be prevented by *something*.

118 This “something” was concluded to be the maintenance of exclusive territories, as evidenced by  
119 males' propensity for aggression toward one another. Noble and Bradley (1933) remarked that  
120 “males tend to fight, and would, no doubt, tend to mark out territories for themselves.” Later, they  
121 said, about lizards in general, that “the only mechanism which is present to prevent males from  
122 copulating with other males as frequently as with females is that males when meeting each other  
123 during the breeding season tend to fight. The result is that males tend to occupy discrete territories,  
124 which are difficult to recognize in the laboratory but which have been described in the field.” The  
125 field studies of *Anolis* behavior referenced by Noble and Bradley (1933) only describe male-male  
126 aggression, and not site fidelity by either males or females. Thus, the existence of territoriality in  
127 anoles was first concluded on the basis of male-male aggression.

128 Evans (1936a, b, c) also concluded from laboratory experiments that male and female *Anolis* lizards  
129 maintain territories. Evans (1936a, c) detailed a weight-based social hierarchy among male *Anolis*  
130 *carolinensis* based on their aggressive interactions, which were described as the “urge to hold  
131 territory.” Again, conclusions were extrapolated from cages, in which animals were kept at high  
132 densities, to the field. For example, Evans (1936c) suggested, without reference to field data, that  
133 “the behavior of caged male *Anolis* is probably a modification of the behavior in the field. Under  
134 natural conditions when a strange male approached a particular territory which is in possession of  
135 another, a fight results...the beaten male retreats, leaving the victor in possession of the territory.”

136 Evans' (1938a) subsequent field study was the first systematic research on anole territorial behavior  
137 in nature. Watching a population of *Anolis sagrei* for about a month, Evans (1938a) concluded that

138 “*Anolis sagrei* exhibits a strong urge to select and defend a definite circumscribed territory.” Though  
139 this conclusion was largely based on observations of male-male aggression, Evans (1938a) also said  
140 that “proof that the species is territorial is given by the fact that the same individual has been  
141 observed many times on consecutive days upon a particular territory.” This dual approach indicates  
142 that Evans (1938a) included site fidelity as well as exclusivity in his conception of territoriality.  
143 Fortuitously, Evans (1938a) included transcriptions of all field notes taken during this study, which  
144 reveal that he concluded site fidelity based on a mean of three distinct observations per lizard.  
145 Though his systematic field-based approach was certainly path-breaking for its time, three  
146 observations made within a short period relative to the full breeding season (*A. sagrei* breed for at  
147 least six months; Tokarz et al. 1998) cannot be considered sufficient to demonstrate persistent site  
148 fidelity.

149 Critique from Evans (1938a, b) prompted Greenberg and Noble (1944) to modify the conditions  
150 under which observations were conducted in the lab—they housed and observed *A. carolinensis*  
151 lizards in larger cages and greenhouses, up to 5 m × 5 m. But these larger arenas may still have been  
152 too small to assess if the multiple males they contained each maintained exclusive areas and showed  
153 site fidelity. The authors mentioned that “an active adult male usually succeeded in dominating the  
154 entire cage,” which implies that males in these cages did not maintain exclusive areas, potentially an  
155 artefact of a small arena size. The conditions in the cage were nonetheless described as “near-normal  
156 competitive conditions.”

157 Oliver’s (1948) methods for observing *A. sagrei* in the Bahamas were similar to Evans’ (1938a)—17  
158 lizards in an area approximately 4 × 20 m were “marked and casually observed for a period of  
159 slightly less than one month.” And though Oliver (1948) “planned to present elsewhere at a later  
160 date a detailed account of the individual and social activity of this species,” to the best of our  
161 knowledge, no such account was published. Oliver (1948) summarized his results as showing that  
162 “definite territories are maintained and defended by both sexes.” However, the territories he  
163 described were not exclusive, because “within the area occupied by each large male there was a  
164 smaller male,” and it is not clear if these smaller males were reproductively active or not. His  
165 conception of territoriality in anoles was therefore potentially consistent with female multiple  
166 mating.



167 Approximately contemporaneous natural history studies described anoles as territorial based on far  
168 less evidence. For example, Thompson (1954) observed a single male *A. carolinensis* displaying at a  
169 “jar containing about a dozen swifts (*Sceloporus undulatus*) that I had collected the day before,” as well  
170 as at a skink, and concluded that “during the entire performance it seemed that the anolis [sic] might  
171 have been trying to hold or establish a territory.” In sum, these early studies of anole social behavior  
172 all readily described these lizards as territorial, despite presenting limited data that were insufficient  
173 to demonstrate site fidelity and did not always demonstrate exclusivity.

#### 174 **THE FIRM ESTABLISHMENT OF TERRITORIAL POLYGYNY**

175 In the decades that followed these early studies, territoriality remained a frequently used description  
176 for anole space use behavior and social interactions; the next watershed moments in this research  
177 trajectory came when these descriptions grew to explicitly include a polygynous mating system.

178 In what remains one of the most detailed studies of *Anolis* territoriality, A. Stanley Rand spent  
179 almost a year observing the movement patterns and social interactions of *Anolis lineatopus* in Jamaica.  
180 This yielded a paper in which Rand (1967a) fully expressed the tension between adhering to a  
181 territorial framework on one hand, and observing variation in site fidelity and exclusivity on the  
182 other. Nonetheless, Rand (1967a, b) proposed a tight link between territoriality and polygyny based  
183 on the idea that males maintain exclusive mating access to females.

184 At least part of Rand’s (1967a) conception of territoriality was derived from earlier research on  
185 anoles. For example, he cited Evans (1938a) in describing the pattern of “a male with a home range  
186 shared by one or several females that are his mates” in *A. sagrei*. He also suggested that *A. lineatopus*  
187 and *A. sagrei* have similar social behavior based on Oliver’s (1948) description of the latter as  
188 territorial. But Rand (1967a) also demonstrated the complications of fitting messy field data into this  
189 territorial framework.

190 These complications are best captured by Rand’s (1967a) descriptions of these lizards’ site fidelity.  
191 First, he stated that “an *A. lineatopus* seldom travels far and most of the area it visits is visible to it  
192 from its usual perch.” But following this he describes how, in calculating the area over which an  
193 individual lizard is active, he “omitted the occasional visits that certain *A. lineatopus* made to perches  
194 well outside of the area where they were usually seen.” Thus departures from site fidelity that may  
195 have been reproductively important were excluded while attempting to establish site fidelity.

196 A similar dissonance was also evident when Rand (1967a) first stated that “the activity range of an  
197 adult *A. lineatopus* seems relatively permanent and certainly shows no seasonal variation” but then  
198 described data that may have suggested otherwise. Documenting the locations of 16 adult males in  
199 one of his field sites, he noted that these males were seen multiple times while sampling in  
200 September and October but only seven of these—less than half—were still present in the site five  
201 months later. Rand (1967a) acknowledged that “of those nine which had not been seen in March,  
202 two were dead, but it is possible that the other seven had shifted their areas outside of the study  
203 plot.” In other words, Rand (1967a) considered that almost half of the adult males in this site may  
204 have shown seasonal departures from site fidelity, but nevertheless concluded that these lizards  
205 remain in fixed locations permanently.

206 Rand’s (1967a) thoughts on exclusivity were complex, illustrated by his statement that “individual  
207 aggression may be expressed as either of two types: dominance hierarchies and territoriality...The  
208 behavior of *A. lineatopus* can not be assigned to either of these categories because it has important  
209 aspects of each of them.” He went on to explain that while “every *A. lineatopus* holds a territory,  
210 defending it against neighbors of the same size...each is a member of a straight line dominance  
211 hierarchy that consists of all those anoles of different sizes whose home ranges overlap its own  
212 home range.” Because large as well as small males were observed mating, such a spatial organization  
213 appears inconsistent with the idea that males maintain exclusive mating access to the females within  
214 their territory.

215 Despite these dissonances and complexities, Rand (1967a) unequivocally linked territoriality to  
216 polygyny, by proposing that male territoriality is adaptive in *Anolis* because it allows males to  
217 maintain exclusive mating access to females:

218 “I think the general occurrence of aggressive behavior and the spacing out it produces in all  
219 sizes of *A. lineatopus* can be explained by...ecological advantages...but the greater  
220 aggressiveness of the adult males requires additional explanation. I think the explanation lies  
221 in a function of territory discussed at length by Tinbergen (1957), which demonstrates the  
222 selective advantage that is conferred on an adult male if he can insure himself exclusive  
223 mating rights to certain females by keeping other males away from them. If he can do this  
224 for a single female, he insures that he will father at least some offspring, and the more  
225 females he can keep isolated, the more offspring he will have and the greater his

226 contribution to the gene pool of the next generation. This being true, there must be a strong  
227 selection pressure for any mechanism that will insure a male exclusive mating rights to one  
228 or more females. The aggressive behavior of adult male *A. lineatopus* that keeps other males  
229 out of the area in which females are permanently living is just such a mechanism.”

230 In a second paper based on these data, Rand (1967b) again concluded that while all individuals  
231 defend territories for access to food, males also defend access to mates, thereby reinforcing the link  
232 between territoriality and polygyny in *Anolis*. This idea that males maintain exclusive mating access  
233 to females was almost certainly a sign of the times. Hinde (1956), in his introduction to an issue of  
234 *Ibis* devoted to territoriality in birds, proposed a hypothesis similar to the one espoused by Rand  
235 (1967a, b): “Any behaviour of the male which helps to prevent his mate being fertilized by another  
236 male is likely to carry a great selective advantage.” This notion of the “monopolizability” of females,  
237 or of the resources to which females are attracted, became the foundation of how behavioral  
238 ecologists understand the evolution of animal mating systems (Orrians 1969; Emlen and Oring 1977).  
239 In anoles, it was quite possibly the basis of the expectation of strict territorial polygyny, which rests  
240 on the assumption that males maintain exclusive mating access to the females in their territory (Fig.  
241 1).

242 Though research on anole mating systems grew rapidly after 1967 (discussed below), the next major  
243 step towards firmly establishing the link between territoriality and polygyny came 17 years later.  
244 Ruby (1984) examined male breeding success in *A. carolinensis* in the context of space use, motivated  
245 by the assessment that “mating systems of reptiles are poorly known...and formative factors remain  
246 undetermined.” Sampling for over five months for each of two consecutive years, including daily  
247 observations for three months each breeding season (though over only a 460 m<sup>2</sup> area), Ruby (1984)  
248 discovered ways in which these lizards’ behavior did not conform to the expectations of territorial  
249 polygyny that were laid out by Rand (1967a, b). For example, he noted that “only 17 of the 68 (25%)  
250 males remained 12 weeks or longer during a single breeding season of 20 weeks,” potentially  
251 indicating variation among males in site fidelity. Moreover, he found that “female [territories]  
252 overlapped more than one male in about 25% of the receptive periods [two week intervals in the  
253 breeding season]” and in calculating the number of potential mates of males, each “female was  
254 assigned to all overlapping males.”

255 These observations and analytic choices indicate that Ruby (1984) uncovered the potential for  
256 females to mate with multiple males, and thus documented a mating system in which males do not  
257 maintain exclusive mating access to individual females. Ruby (1984) even considered the possibility  
258 that sperm storage is an adaptation for female mate choice in these lizards. Nonetheless, at the very  
259 outset of the paper, Ruby (1984) proposed that mating systems in lizards range from monogamy to  
260 polygyny and described territoriality as “one means of gaining exclusive mating access to females.”  
261 Later in the paper, he stated that “because the *Anolis* breeding system appears to be resource defense  
262 polygyny (Emlen and Oring 1977), territoriality is favored as a means of restricting access to mates.”  
263 It is possible that Ruby’s (1984) data led him to soften his stand from expecting males to maintain  
264 “exclusive” mating access to expecting “restrict[ed]” mating access; nonetheless, Ruby (1984) was  
265 subsequently frequently cited as supporting the idea that anoles are territorial and polygynous  
266 without explicitly acknowledging this potential for female multiple mating (e.g. Qualls and Jaeger  
267 1991; Stamps 1995; Jenssen et al. 2000, 2005; Lovern 2000).

#### 268 **THE CONSEQUENCES OF LIMITED SAMPLING**

269 Research on anole behavior blossomed between Rand (1967a, b) and Ruby (1984). However,  
270 because by this point the consensus seemed to be that anoles are territorial, this research was not  
271 often designed to explicitly test if these lizards behave territorially, i.e. to demonstrate that they  
272 exhibit site fidelity and exclusivity. Specifically, territoriality was an almost foregone conclusion in  
273 studies with a limited spatial and temporal extent of sampling. In other words, the design of many of  
274 these studies was such that they were unlikely to uncover evidence that individual anoles vary in site  
275 fidelity or exclusivity, and therefore were unlikely to point to the possibility that females often mate  
276 with multiple males

277 If the sampling period of a study of social behavior is not long enough, then relatively infrequent but  
278 reproductively consequential departures from either male-male exclusivity or site fidelity may not be  
279 detected often enough that they are considered signal and not noise. For site fidelity, this includes  
280 not only occasional forays away from and returns to a fixed territory, but also shifts in territory  
281 location that may take place only a few times per breeding season—neither would be detected by  
282 studies with short durations. An extreme example of a constrained sampling period can be seen in  
283 Philibosian’s (1975) study of *Anolis acutus* and *Anolis cristatellus*, in which he stated that “often an  
284 observation period of one day was sufficient to record enough positions and enough encounters

285 involving the residents on a tree to make reasonably accurate territory descriptions.” As researchers  
286 became more certain that anoles are territorial, they became comfortable making more extreme  
287 assumptions. For example, in estimating the number of neighbors of individual *A. sagrei*, Calsbeek  
288 (2009) estimated the center of a lizard’s territory as simply the first location at which that lizard was  
289 observed.

290 Moreover, if a study of social behavior does not sample over a large enough area and a sampled  
291 individual disappears from the study site, researchers cannot know if the individual has died or  
292 simply moved. Thus, studies with limited sampling areas will be most likely to sample only those  
293 individuals who stay in the same place. For example, Trivers (1976), studying the Jamaican *Anolis*  
294 *garmani*, “attempted to map male territories by concentrating on a small portion of the study area.”  
295 He stated that “males are sighted too infrequently to measure territory size the usual way; that is, to  
296 construct a volume fitting such sightings.” These infrequent sightings could conceivably be due to  
297 the low chance of re-spotting individuals with low site fidelity within a small area. But Trivers (1976)  
298 continued by saying that “fortunately males 105 mm and larger show a strong tendency to occupy  
299 trees...Typically, during a given visit, a large male will be sighted between five and ten times in a  
300 large tree.” Thus, Trivers (1976) focused his sampling for estimating territory size to a small area  
301 known to be occupied by individuals with high site fidelity, limiting the variation in movement  
302 behavior that could be detected.

303 The combination of spatially and temporally restricted sampling can be seen in work by Jenssen and  
304 colleagues (e.g., Jenssen et al. 1995; Jenssen and Nunez 1998), who documented the behavior of a  
305 population of *A. carolinensis* along the Augusta Canal in Georgia. This population inhabited a thin  
306 strip of vegetation (three to six meters wide), which comprised clumps of trees observable from an  
307 elevated walkway, and the activity of lizards in each clump of trees was watched for only eight days,  
308 out of a months-long breeding season. Nonetheless, these data were interpreted to conclude that  
309 “males are polygynous, defend closely monitored and stable territories, and devoted large blocks of  
310 time and energy on territory maintenance” (Jenssen et al. 1995). With time, statements of territorial  
311 polygyny thought to be supported by these data became even stronger, such as this statement from  
312 Jenssen et al. (2000): “the *A. carolinensis* mating system is driven by the outcome of intermale  
313 territorial aggression. Winners achieve and maintain direct mating access to varying numbers of  
314 females...because females are relatively sedentary and clustered in small contiguous home ranges.”

315 It is certainly worth noting that while the sampling design in these studies reveals, with hindsight,  
316 certain assumptions regarding territoriality, Jenssen and colleagues' fieldwork simultaneously  
317 challenged other beliefs that were commonly held by laboratory-based researchers studying anole  
318 behavior. For example, using similar sampling methods to those described above, Jenssen et al.  
319 (2001) tested and found no evidence for the hypothesis, long held by neuroendocrinologists, that  
320 male *A. carolinensis* emerge at the end of the winter and establish territories prior to female  
321 emergence.

#### 322 **FOUR FATES OF DOCUMENTED DEPARTURES FROM TERRITORIALITY**

323 Evidence for variation in territorial behavior, namely the extent of site fidelity and exclusivity, was  
324 implicitly and explicitly excluded through much of the later literature on *Anolis* social behavior. This  
325 exclusion took on at least four different forms. The first and second forms correspond to what is  
326 known as the "primary simplification" of scientific research, whereby the construction of facts is  
327 influenced by scientists' decisions on how to present the data in a paper (Dewsbury 1998).

328 In the first form, already seen in Rand (1967a), departures from territoriality were removed at the  
329 time of analysis. For example, Trivers (1976) quantified male *A. garmani* territory sizes based on the  
330 size of trees that individuals occupied, and "a tree was assigned to a male if he was seen three or  
331 more times in it without any other adult male being seen therein." However, "if, as happened several  
332 times, a large tree was also known to be occupied by a small adult male (85 mm – 104 mm), both  
333 males were excluded from the data, since too few data were available to partition the tree between  
334 them," even though male *A. garmani* as small as 87 mm in size were observed copulating with  
335 females. Thus, departures from male-male exclusivity were explicitly excluded when considering  
336 these lizards' territoriality. Similar choices were also made in considerations of site fidelity. For  
337 example, Schoener (1981) argued that in calculating home range areas based on location data, "the  
338 inclusion of the outermost observations...may still be undesirable" because "the utilization may  
339 resemble a more compact distribution if outliers were disregarded." As a result, the home ranges of  
340 four anole species in the Bahamas were calculated without including the "10% of points farthest  
341 from the geometric center" (Schoener and Schoener 1982). While this analytic choice is certainly  
342 justifiable for calculating the centers of individuals' activity, it compromises the ability to predict  
343 mating patterns from space use behavior, unless one is certain that individuals do not mate when at  
344 the 10% of points farthest from the geometric center.



345 A second fate of observed departures from territoriality, as seen in Ruby (1984), involved  
346 quantifying them but omitting them from interpretation. For instance, Schoener and Schoener  
347 (1980) describe *Anolis sagrei* as exemplifying the “paradigm of a territorial, polygynous species” even  
348 though between 3% and 28% of males in six populations remained within their study sites for less  
349 than a week, potentially indicating frequent deviations from site fidelity. An implicit justification for  
350 ignoring this often substantial proportion of males from a description of the lizards’ mating system  
351 is that these “floating” males do not mate with females. Though this is a reasonable and testable  
352 hypothesis, *assuming* that non-territorial males do not reproduce simply because they are not  
353 territorial is unjustified. In another example, Fleishman (1988) categorized adult male *Anolis auratus*  
354 as either territorial or non-territorial, based on their display behavior and levels of aggression. Even  
355 though non-territorial males were observed copulating with females within the territories of  
356 territorial males, Fleishman (1988) stated that “territories of *Anolis* males are primarily for exclusive  
357 access to mates.”

358 In a third, distinct fate, research that explicitly documented departures from territoriality stayed  
359 unpublished and had little influence. Consider two abstracts submitted to the annual meeting of the  
360 Society for Integrative and Comparative Biology. Both studies (Alworth 1986; Webster and  
361 Greenberg 1988) examined *A. carolinensis* behavior in enclosures. While Webster and Greenberg  
362 (1988) found that “the average site fidelity was 52%,” Alworth (1986) concluded that “territoriality  
363 in these lizards [should] be regarded as a highly flexible behavioral tactic adaptive only in specific  
364 contexts” and that “the broad characterization of a genus or species as territorial is misleading.”  
365 However, to the best of our knowledge, neither of these studies was published.

366 Finally, in the fourth fate, deviations from territorial polygyny in *Anolis* were documented and  
367 acknowledged fully, but the species’ social behavior was described as an exception to the rule. For  
368 example, *Anolis valencienni* was described by Hicks and Trivers (1983) as displaying “many features  
369 atypical of other *Anolis*,” including the lack of territorial behavior by either males or females.  
370 Consequently, “because many adults of both sexes encounter each other daily, there are unusual  
371 opportunities for female choice...over a period of six weeks, a female may copulate with five or more  
372 males.” This “unusual” opportunity for female multiple mating was hypothesized to be due to *A.*  
373 *valencienni*’s tendency to forage more actively than other anoles. We are not suggesting that *A.*  
374 *valencienni* does not differ in its behavior from other anoles; in fact, its behavior *must* be different  
375 enough that it was recognized as exceptional by researchers working within the paradigm of

376 territorial polygyny. But because *A. valencienni* was positioned as exceptional, its behavior was never  
377 cause to re-evaluate the behavior of other anole species.

## 378 TWO EXCEPTIONS

379 In seven decades of research on anoles, two studies explicitly described these lizards' social behavior  
380 as being consistent with female multiple mating. The first—Gordon (1956)—remained relatively  
381 uninfluential, but the second—Tokarz (1998)—laid the groundwork for the reconciliation of  
382 behavioral observations with subsequent genetic studies that in fact detected evidence for female  
383 multiple mating.

384 In his dissertation, Gordon (1956) aimed “to analyze, biodemographically, two local populations” of  
385 *A. carolinensis*. The work comprised primarily of nocturnal censuses in two 20 m × 20 m plots every  
386 two weeks for over a year, with all captured individuals marked permanently. Gordon's (1956) data  
387 revealed the potential for departures from site fidelity: 73% of 1024 marked lizards were observed  
388 just once within the study site, and only 8% of all lizards, and 13% of adults, were observed three or  
389 more times. Though some of the disappearances were undoubtedly due to predation and others  
390 must have resulted from the failure to detect individuals again, the data are also consistent with  
391 many individuals in this population exhibiting low site fidelity. Gordon (1956) later questioned  
392 anoles' site fidelity when describing lengthy disappearances of individual lizards from the study site  
393 and frequent long distant movements. He also wrote the following:

394 “The individual female may copulate with more than one male per season. The social group  
395 is maintained by the activity of the dominant male, and sexual bonds between the male and  
396 his females are loosely formed. Females tend to wander more than males and ample  
397 opportunity is present for a female to be attracted to, and take up residence in, another  
398 male's territory. In cases of territorial hierarchy, the dominant male and his subordinates may  
399 share the same group of females.”

400 Though it certainly had the potential to do so, Gordon's (1956) thesis did not end up provoking a  
401 shift in how behavioral ecologists think about anole mating systems. For example, three influential  
402 papers on *Anolis* territorial behavior (Schoener and Schoener 1982; Ruby 1984; Jenssen et al. 1995)  
403 cite Gordon (1956) but do not refer to his suggestion that female anoles may readily mate with  
404 multiple males.



405 Over four decades later, behavioral observations by Tokarz (1998) demonstrated even more clearly  
406 that female *A. sagrei* have the opportunity to mate with multiple males. He explicitly questioned the  
407 idea that males maintain exclusive mating access to females in their territories, saying that “few  
408 studies have attempted to record the mating pattern of individual females in nature as a means of  
409 evaluating the potential for female mate choice and sperm competition.” Tokarz’s (1998) data  
410 revealed that “most females (75%) had more than one mating partner, and this was due almost  
411 entirely to females mating with new males that successfully supplanted previous males from their  
412 territories.” A decade later, however, Tokarz (2008) minimized his own previous findings, saying  
413 that “male territories in *A. sagrei* appear to be relatively stable at least during the midsummer portion  
414 of the breeding season (Evans, 1938[a]), although instances of males being supplanted from their  
415 territories by other males have been observed (Tokarz, 1998).”

416 It is tempting to conclude that Tokarz’s (1998) results solve the problem of the mismatch between  
417 behavioral and genetic descriptions of anoles’ mating system. To an extent, they do, but his  
418 documentation of turnover in male territory occupancy is only one of many different ways in which  
419 departures from strict territorial polygyny (Fig. 1) could facilitate female multiple mating. Other  
420 ways, such as multiple reproductive males occupying overlapping areas, had been documented in  
421 anoles by previous researchers, but their potential relevance to female multiple mating was  
422 downplayed. Yet other ways, such as the existence of reproductive males or females who wander  
423 non-territorially, are unlikely to be detected in studies with small sampling areas or durations. This  
424 includes Tokarz’s (1998) study, in which 16 individuals occupying a single tree that was 2 m in  
425 diameter, were watched for just over a month. That said, even Tokarz (1998) observed “six instances  
426 in which males...entered an adjoining male’s territory and courted females there.”

427 These different possible routes to multiple female mating have different implications for anoles’  
428 reproductive dynamics and sexual selection. Multiple mating resulting from male territorial turnover  
429 may lead to serial polygyny, in which at any one time, a territorial male is the exclusive mate of  
430 females residing within his territory. Alternatively, other types of departures from site fidelity and  
431 exclusivity lead to situations in which, at any given time, females may be able to mate with several  
432 males, allowing for female mate choice. While the serial territorial polygyny that Tokarz (1998)  
433 observed may certainly be a male adaptation for achieving high reproductive success, we cannot  
434 know from existing behavioral data if it is the only reproductive strategy, or even the dominant  
435 reproductive strategy, adopted by male anoles.

436 Crucially, it is not necessary that every individual in a population depart from site fidelity or  
437 exclusivity in the same way or to the same extent for the link between territoriality and polygyny to  
438 be compromised. There is therefore a disconnect across levels of biological organization that is  
439 central to reconciling behavioral and genetic descriptions of mating systems—while behavioral  
440 descriptions apply to individuals, the mating system is a population-level trait. Equally, different  
441 populations and species may also vary in the composition of reproductive strategies across  
442 individuals (Lott 1984; Kappeler et al. 2013), and the proportion of individuals in a population who  
443 behave territorially influences our ability to predict whether the population’s mating system will in  
444 fact be polygynous. This explanation also makes clear that many previous studies of anole social  
445 behavior that concluded that anoles are territorial may have accurately described the behavior of *some*  
446 individuals. However, to the extent that the results of existing genetic studies are general, previous  
447 behavioral studies either did not accurately describe the behavior of *all* individuals, or erroneously  
448 failed to consider as reproductively important those individuals whose behavior they described as  
449 deviating from territoriality. The disconnect between behavioral and genetic descriptions of a  
450 population’s mating system thus becomes quantifiable by considering variation across reproductive  
451 individuals in the extent to which their behavior differs from territoriality.

## 452 **THE AGE OF GENETICS**

453 The use of genetic tools uncovered female multiple mating in three species of anoles—*A. carolinensis*,  
454 *A. sagrei*, and *A. cristatellus*. Each of these studies (one paper published in a peer reviewed journal, as  
455 well as three theses that, at present, are unpublished) discussed the implications of their findings for  
456 territoriality to different extents.

457 Passek (2002) examined the possibility for sperm choice or competition in *A. carolinensis* using a  
458 combination of behavioral and genetic approaches. She invoked variation in site fidelity and  
459 exclusivity when saying that “while males defend territories that contain multiple female home  
460 ranges (Jenssen et al. 1995), the potential exists for extra-pair paternity due to temporary invasion by  
461 “floater” males or female home ranges being overlapped by more than one male (Ruby 1984).”  
462 Though Passek’s (2002) description suggests only occasional departures from territoriality, her  
463 genetic data showed that 48% of offspring were sired by males other than the one identified as the  
464 territory owner, including 21% sired by smaller males within the same territory and 15% sired by  
465 neighboring males. The paternity of the remaining 12% of offspring could not be determined. In her

466 conclusion, Passek (2002) expressed skepticism that anyone had accurately measured “the frequency  
467 of territorial exchanges resulting from territory takeovers.”

468 Johnson (2007) mapped *A. cristatellus* space use behavior over a three week period, and found that  
469 females’ “territories overlapped an average of 3.3 males.” Genetic data confirmed this potential for  
470 females to mate multiply, showing that “52% of females laid eggs sired by multiple males.”  
471 Moreover, variation in site fidelity also played a role in facilitating female multiple mating, because  
472 “26% of offspring were sired by males whose territories did not overlap that of the mother.” She  
473 concluded that “these results may be explained by a combination of a male dominance  
474 hierarchy...and female mate choice,” mating strategies and interactions that are not encompassed by  
475 strict territorial polygyny (Fig. 1).

476 In the only published evidence for multiple mating by female anoles, Calsbeek et al. (2007) found  
477 that “more than 80% of field-caught *A. sagrei* females that produced two or more progeny had  
478 mated with multiple males [making] *A. sagrei* one of the most promiscuous amniote vertebrates  
479 studied to date.” However, this paper did not tackle the implications of its results for territoriality.

480 Finally, the most direct evidence for departures from territoriality influencing anole mating systems  
481 again combined behavioral observations with genetic data (Harrison 2014). Studying *A. carolinensis*,  
482 Harrison (2014) assumed site fidelity in her behavioral sampling by mapping the home ranges of  
483 lizards after observing individual’s spatial locations for 30-minute focal observations (it is not clear  
484 how many focal observations were conducted for each individual; Harrison [2014] does mention  
485 that “behavioral observations were conducted at irregular intervals, making it difficult to determine  
486 whether males shifted their territories during the study period”). However, her genetic data revealed  
487 that spatial proximity, as determined by the focal observations, did not predict mating between pairs  
488 of males and females. In fact, the mean distance ( $\pm$  standard deviation) between mating pairs was  
489  $33\pm 22$  m, over five times the mean estimated territory diameter in that population. This indicates  
490 that individual lizards *must have* moved between when they mated and when they were observed. In  
491 the face of this evidence, Harrison (2014) continued to invoke a territorial paradigm to understand  
492 anole social behavior, at least initially: “males and females from opposite sides of the study site  
493 mated relatively frequently...often traversing distances over 60 m. For this to occur, either the male  
494 or female (or both) left its territory at some point, or they mated before establishing territories and  
495 used stored sperm.” Later, however, she proposed a number of hypotheses for male movement

496 behavior, including the existence of an alternative non-territorial, wandering male strategy adopted  
497 by adult males, and temporal variation in individual site fidelity within a single breeding season, that  
498 definitely break out of the mold of territoriality.

#### 499 **BROADER IMPLICATIONS FOR ANIMAL MATING SYSTEMS**

500 This century-long trajectory of research on *Anolis* mating systems exemplifies several larger issues  
501 that could plague the study of animal mating systems more generally. However, it is challenging to  
502 establish that the problems we identify here are generally applicable, because discerning their  
503 applicability to a particular taxon demands a close familiarity with the full body of literature on that  
504 taxon's biology, as well as familiarity with the organism's biology itself. In this final section, we  
505 identify the main driving forces that led to the incomplete and possibly incorrect descriptions of  
506 *Anolis* social behavior, culminating in the erroneous prediction that each female's offspring will be  
507 sired by the single male in whose territory she resides. We hope this discussion will prompt  
508 researchers who are intimately familiar with other organisms' biology to re-examine the basis of  
509 what we think we know to be true about those organisms' social behavior.

510 The history of research on *Anolis* mating systems demonstrates multiple ways in which the erratic  
511 and contingent progress of research may have prevented researchers from fully describing the  
512 behaviors that facilitate female multiple mating in these lizards. The central problem was described  
513 well by Stamps (1994), although she was discussing specific aspects of territoriality not covered in  
514 this review:

515       “Current ideas about the behavior of territorial animals are based on a series of  
516       assumptions...in some cases these assumptions have not been adequately tested. By virtue  
517       of repetition, untested assumptions have a tendency to solidify into “quasi-facts.””

518 Such repetition certainly characterized the earliest studies of *Anolis* social behavior, where studies  
519 repeatedly concluded that anoles are territorial based on often flimsy evidence. It is not clear  
520 whether the authors of these earliest studies considered the implications of these lizards' space use  
521 and movement patterns for their mating system. It is possible that territoriality was so readily  
522 assumed and concluded in these early studies *precisely because*, under the strictest interpretation,  
523 territoriality is incompatible with female multiple mating. Charles Darwin, in his seminal text on  
524 sexual selection, expressed the prevailing view at the time that females are generally “coy,” “passive,”

525 and “less eager” to mate than are males (Darwin 1871; discussed in Hrdy 1986; Dewsbury 2005;  
526 Tang-Martinez and Ryder 2005; Tang-Martinez 2016). Moreover, many biologists at the time  
527 believed that females of most species were unlikely to possess the cognitive ability to make choices  
528 about which males to mate with, and ignored evidence to the contrary (reviewed in Milam 2010).  
529 Invoking a mating system such as territorial polygyny, which under the strictest interpretation leaves  
530 females unable to choose between males and assumes that females have no reason to seek out  
531 multiple mates, thus may have been a sign of the times.

532 However, Greenberg and Noble (1944) conducted experiments explicitly to test whether female  
533 anoles choose mates on the basis of males’ dewlaps, asking if females preferred to mate with males  
534 with intact or manipulated dewlaps. They found no effect of dewlap manipulation on mating  
535 success, but by asking the question, these authors revealed that they considered female mate choice  
536 possible in anoles, and thus considered that females have the opportunity to mate with multiple  
537 males. In contrast, later researchers studying anole territorial behavior frequently maintained that  
538 female mate choice was unlikely because it is precluded by territoriality. For example, Schoener and  
539 Schoener (1980) suggested that “adult females seem quite sedentary in [*A. sagrei*], and the  
540 opportunity for female choice would seem correspondingly limited,” and Stamps (1983), in a review  
541 of lizard territoriality and polygyny, said the following:

542 "In most insectivores, female choice of mating partner is probably fairly limited. Since  
543 females do not leave their home ranges in order to mate, prospective male partners must  
544 have home ranges overlapping that of the female. A female with a home range on the border  
545 between 2 male home ranges might be able to choose between them, but this option is  
546 restricted in territorial species by the males' tendencies to arrange their territories to  
547 completely enclose female home ranges."

548 Thus, though researchers all the way from Noble and Bradley (1933) to Stamps (1983) and beyond  
549 described anoles as territorial, the predictions for mating patterns derived from that behavioral  
550 description, such as whether females have the opportunity to choose mates, could be inconsistent  
551 with one another.

552 That the term “territoriality” as interpreted by different researchers could be compatible with  
553 fundamentally different expectations for patterns of mating and sexual selection highlights the fact  
554 that very few studies define territoriality explicitly (Maher and Lott 1995). Different authors’

555 conceptions of territoriality include different degrees of variation in both site fidelity and exclusivity,  
556 and therefore lead to different expectations for female multiple mating. This fuzziness in the  
557 definition of territoriality also raises the following question—at what point might we conclude that  
558 territoriality is too imprecise a term to be useful as a predictor of a species' mating patterns?  
559 Departures from male-male exclusivity have been observed in anoles (e.g. Rand 1967a; Trivers 1976;  
560 Fleishman 1988), but these examples were still considered to be within the fold of territoriality  
561 because “exclusivity” was qualified or limited to mean that males only exclude size-matched  
562 individuals. These qualifications were made even though males in smaller size categories were  
563 observed to mate with females. Similarly, a lack of clarity about the meaning of site fidelity  
564 permeates research on territorial behavior—does “site fidelity” mean staying in the same place,  
565 leaving but always returning to the same place, or attempting (but possibly failing) to stay in or  
566 return to the same place? How long does an individual have to stay in a certain place to be  
567 considered site faithful? Almost all possible answers to these questions have, at some point in the  
568 last century, been implicitly or explicitly accepted as consistent with territorial behavior in anoles,  
569 even though each answer can lead to very different expectations for mating patterns.

570 Once territoriality became established as a description of anoles' mating system, the design and  
571 interpretation of subsequent studies of these lizards' social behavior made it difficult to detect  
572 variation among individuals in site fidelity or exclusivity, variation that could easily be reproductively  
573 consequential. Which individuals were studied, the extent of sampling area and duration, the data  
574 that were analyzed versus excluded, and the extent to which inconsistent findings were  
575 deemphasized—each of these scientific decisions involved choices that would determine whether  
576 the study could actually test the precepts of territoriality or whether it simply assumed them. For the  
577 most part, the choices made were such that territoriality remained untested. However, these studies  
578 were written and interpreted as if the idea that anoles are territorial had been tested, and thus each  
579 seemed to provide independent confirmation of this description of their spatial and social  
580 organization. In fact, even though these studies were conducted by different researchers on different  
581 populations and species of anoles, they were conceptually non-independent, unintentionally leading  
582 the earliest studies to “assume a stature that their original authors never intended” (Stamps 1994).

583 It is this problem—adhering to a conceptual paradigm while designing studies that are consequently  
584 unlikely to uncover or take seriously the evidence that would allow you to escape that paradigm—  
585 that we believe is the most important problem revealed by our review. This problem cannot be



586 solved simply by collecting more data; reaching a solution additionally requires that we explicitly  
587 identify and question the assumptions made when designing research (Gowaty 2003). But framing  
588 the challenge thus also makes the solution clear—we should continue collecting observations of  
589 animals' behavior in a manner that is as free as possible from existing conceptual frameworks, even  
590 in taxa whose biology we think we know well. In other words, the solution calls for renewed and  
591 continued attention to organisms' natural history (Greene 2005; Tewkesbury et al. 2014). As Greene  
592 (2005), who defined natural history as “descriptive ecology and ethology,” put it, “discoveries of new  
593 organisms and new facts about organisms often reset the research cycles of hypothesis testing and  
594 theory refinement that underlie good progressive science.”

595 The call for a close relationship between natural history observations and the advance of research in  
596 animal mating systems is far from new. We conclude with a remarkably apt excerpt from a 1958  
597 letter to the editor of *Ibis* from John T. Emlen, following an issue about territoriality in birds (Hinde  
598 1956):

599 “There is a growing tendency among ornithologists to blindly and devotedly follow what is  
600 becoming a fixed or conventional concept of territory. Instead of describing their  
601 observations directly, authors often seem to go out of their way to fit them into the  
602 “accepted” pattern through the “approved” terms and phrases.”

603 Emlen (1958) continued:

604 “My concern in this letter is with the tyranny of words and with the dangers inherent in  
605 patterned thinking. The fascination of catch phrases and the reverence with which they  
606 come to be held are major, though subtle, obstructions to free and accurate thinking.  
607 Conventionalized phrasing, furthermore, often leads to conventionalized thinking, the very  
608 antithesis of free investigation and the arch-enemy of scientific progress. A neat, substantive  
609 definition of territory has the fascination of finality, but in a virile science dead ends must be  
610 avoided, not sought; it has the fascination of authority, but basically we recognize that the  
611 study of natural phenomena must not be subordinated to the study of intellectual creations.”

612 The accurate quantification by genetic means of individuals' reproductive success in natural  
613 populations is valuable not just because such data help to render more complete descriptions of  
614 animals' social and reproductive behavior. These data also let us identify taxa in which the erratic

615 and contingent progression of scientific research may have led behavioral ecologists towards  
616 erroneous conclusions about animals' mating systems. But the genetic data alone do not shed light  
617 on the question of how we come to believe such conclusions. We contend that taxon-specific  
618 historical investigations into this question allow us to escape the confines of “conventionalized  
619 phrasing” and “conventionalized thinking,” and are an important step towards designing studies that  
620 will let us understand animal social behavior in its full complexity.

621

### 622 *Acknowledgments*

623 J.A. Stamps and R.R. Tokarz gave us valuable feedback on previous drafts that substantially  
624 improved the manuscript, as did C.M. Donihue, Y.E. Stuart, S.R. Prado-Irwin, P. Muralidhar, M.E.  
625 Kemp, N.E. Herrmann, M.R. Lambert, E.E. Burnell, D.P. Rice, J.H. Boyle, L.J. Martin, and two  
626 anonymous reviewers.

627

### 628 REFERENCES

- 629 Alworth TJ (1986) Perch availability and season affect aggression levels in the territorial lizard, *Anolis*  
630 *carolinensis*. *Am Zool* 26:1041
- 631 Avise JC, Jones AG, Walker D et al (2002) Genetic mating systems and reproductive natural  
632 histories of fishes: Lessons for Ecology and Evolution. *Annu Rev Genet* 36:19–45
- 633 Birkhead TR (2010) How stupid not to have thought of that: post-copulatory sexual selection. *J*  
634 *Zool* 281:78–93
- 635 Boomsma JJ, Kronauer DJC, Pedersen JS (2009). The evolution of social insect mating systems. In:  
636 Gadaue J, Fretwell J (eds) *Organization of Insect Societies*. Harvard University Press,  
637 Cambridge, pp 3–25
- 638 Bush, JM, Quinn MM, Balreira EC, Johnson MA (2016) How do lizards determine dominance?  
639 Applying ranking algorithms to animal social behaviour. *Anim Behav* 118:65–74
- 640 Calsbeek R (2009) Sex-specific adult dispersal and its selective consequences in the brown anole,  
641 *Anolis sagrei*. *J Anim Ecol* 78:617–624
- 642 Calsbeek R, Bonneaud C, Prabhu S, Manoukis N, Smith TB (2007) Multiple paternity and sperm  
643 storage lead to increased genetic diversity in *Anolis* lizards. *Evol Ecol Res* 9:495–503
- 644 Clutton-Brock T (2009) Sexual selection in females. *Anim Behav* 77:3–11
- 645 Coltman DW, Festa-Bianchet M, Jorgensen JT, Strobeck C (2002) Age-dependent sexual selection in  
646 bighorn rams. *Proc R Soc Lond B* 269:165–172
- 647 Darwin C (1871) *The Descent of Man, and Selection in Relation to Sex*. John Murray, London
- 648 Dewsbury DA (1998) Robert Yerkes, sex research, and the problem of data simplification. *Hist*  
649 *Psychol* 1:116–129



- 650 Dewsbury DA (2005) The Darwin-Bateman paradigm in historical context. *Integr Comp Biol*  
651 45:831–837
- 652 Emlen JT (1958) Defended area?—A critique of the territory concept and of conventional thinking.  
653 *Ibis* 99:352
- 654 Emlen ST, Oring LW (1977) Ecology, sexual selection, and the evolution of mating systems. *Science*  
655 197:215–223
- 656 Evans LT (1936a) Social behavior of the normal and castrated lizard, *Anolis carolinensis*. *Science*  
657 83:104
- 658 Evans LT (1936b) Territorial behavior of normal and castrated females of *Anolis carolinensis*. *Pedagog*  
659 *Semin J Genet Psychol* 49:49–60
- 660 Evans LT (1936c) A study of a social hierarchy in the lizard *Anolis carolinensis*. *Pedagog Semin J*  
661 *Genet Psychol* 48:88–111
- 662 Evans LT (1938a) Cuban field studies on the territoriality of the lizard *Anolis sagrei*. *J Comp Psychol*  
663 25:97–125
- 664 Evans LT (1938b) Courtship behavior and sexual selection of *Anolis*. *J Comp Zool* 26:475–497
- 665 Fisher HS, Hoekstra HE (2010) Competition drives cooperation among closely related sperm of  
666 deer mice. *Nature* 463:801–803
- 667 Fitzpatrick SM, Wellington WG (1982) Insect territoriality. *Can J Zool* 61:471–486
- 668 Flanagan SP, Bevier CR (2014) Do male activity level and territory quality affect female association  
669 time in the brown anole, *Anolis sagrei*? *Ethology* 120:365–374
- 670 Fleishman LJ (1988) The social behavior of *Anolis aeneus*, a grass anole from Panama. *J Herpetol*  
671 22:13–23
- 672 Gordon RE (1956) The biology and biodemography of *Anolis carolinensis carolinensis* Voight.  
673 Dissertation, Tulane University
- 674 Gowaty PA (2003) Sexual natures: How feminism changed evolutionary biology. *Signs* 28:901–921
- 675 Greenberg B, Noble GK (1944) Social behavior of the American chameleon (*Anolis carolinensis*  
676 Voight). *Physiol Zool* 17:392–439
- 677 Greene HW (2005) Organisms in nature as a central focus for biology. *Trends Ecol Evol* 20:23–27
- 678 Griffith SC, Owens IPF, Thuman KA (2002) Extra pair paternity in birds: a review of interspecific  
679 variation and adaptive function. *Mol Ecol* 11:2195–2212
- 680 Harrison AS (2014) The evolution and diversity of the *Anolis* dewlap. Dissertation, Harvard  
681 University
- 682 Hicks RM, Trivers RL (1983) The social behavior of *Anolis valencienni*. In: Rhodin GJ, Miyata K (eds)  
683 *Recent Advances in Herpetology and Evolutionary Biology*. Museum of Comparative  
684 Zoology, Cambridge, pp 570–595
- 685 Hinde RA (1956) The biological significance of the territories of birds. *Ibis* 98:340–369
- 686 Hrdy SB (1986) Empathy, polyandry, and the myth of the “coy” female. In: Bleier R (ed) *Feminist*  
687 *Approaches to Science*. Pergamon Press, New York, pp 119–146
- 688 Jenssen TA, Decourcy KR, Congdon JD (2005) Assessment in contests of male lizards (*Anolis*  
689 *carolinensis*): how should smaller males respond when size matters? *Anim Behav* 69:1325–1336
- 690 Jenssen TA, Greenberg N, Hovde KA (1995) Behavioral profile of free-ranging male lizards, *Anolis*  
691 *carolinensis*, across breeding and post-breeding seasons. *Herpetol Monogr* 9:41–62
- 692 Jenssen TA, Nunez SC (1998) Spatial and breeding relationships of the lizard, *Anolis carolinensis*:  
693 Evidence of intrasexual selection. *Behaviour* 135:981–1003
- 694 Jenssen TA, Orrell KS, Lovern MB (2000) Sexual dimorphism in aggressive signal structure and use  
695 by a polygynous lizard, *Anolis carolinensis*. *Copeia* 2000:140–149

- 696 Johnson MA (2007) Behavioral ecology of Caribbean *Anolis* lizards: A comparative approach.  
697 Dissertation, Washington University
- 698 Kappeler PM, Barrett L, Blumstein DT, Clutton-Brock TH (2013) Constraints and flexibility in  
699 mammalian social behaviour: introduction and synthesis. *Philos T Roy Soc B* 368:0120337
- 700 Klug H (2011) Animal mating systems. eLS John Wiley and Sons Ltd Chichester
- 701 Losos JB (2009) Lizards in an Evolutionary Tree. University of California Press, Berkeley
- 702 Lott DF (1984) Intraspecific variation in the social systems of wild vertebrates. *Behaviour* 88:266–  
703 325
- 704 Maher CR, Lott DF (1995) Definitions of territoriality used in the study of variation in vertebrate  
705 spacing systems. *Anim Behav* 49:1581–1597
- 706 Martins EP (1994) Phylogenetic perspectives on the evolution of lizard territoriality. In: Vitt LJ,  
707 Pianka ER (eds) *Lizard Ecology: Historical and Experimental Perspectives*. Princeton  
708 University Press, Princeton, pp 117–144
- 709 Milam EL (2010) Looking for a few good males. The Johns Hopkins University Press, Baltimore
- 710 Noble GK, Bradley HT (1933) The mating behavior of lizards; its bearing on the theory of sexual  
711 selection. *Ann NY Acad Sci* 35:25–100
- 712 Oliver JA (1948) The anoline lizards of Bimini, Bahamas. *Am Mus Novit* 1383:1–36
- 713 Orians GH (1969) On the evolution of mating systems in birds and mammals. *Am Nat* 103:589–603
- 714 Orr TJ, Brennan PLR (2015) Sperm storage: distinguishing selective processes and evaluating  
715 criteria. *Trends Ecol Evol* 30:261–272
- 716 Passek KM (2002) Extra-pair paternity within the female-defense polygyny of the lizard, *Anolis*  
717 *carolinensis*: Evidence of alternative mating strategies. Dissertation, Virginia Polytechnic  
718 Institute
- 719 Philibosian R (1975) Territorial behavior and population regulation in the lizards, *Anolis acutus* and  
720 *A. cristatellus*. *Copeia* 1975:428–444
- 721 Qualls CP, Jaeger RG (1991) Dear enemy recognition in *Anolis carolinensis*. *J Herpetol* 25:361–363
- 722 Rand AS (1967a) Ecology and social organization in the iguanid lizard *Anolis lineatopus*. *Proc US Nat*  
723 *Mus* 122:1–79
- 724 Rand AS (1967b) The adaptive significance of territoriality in iguanid lizards. In: Milstead WW (ed)  
725 *Lizard Ecology: A symposium*. University of Missouri Press, Columbia, pp 106–115
- 726 Ruby DE (1984) Male breeding success and differential access to females in *Anolis carolinensis*.  
727 *Herpetologica* 40:272–280
- 728 Schoener TW (1981) An empirically based estimate of home range. *Theor Popul Biol* 20:281–325
- 729 Schoener TW, Schoener A (1980) Densities, sex ratios, and population structure in four species of  
730 Bahamian *Anolis* lizards. *J Anim Ecol* 49:19–53
- 731 Schoener TW, Schoener A (1982) Intraspecific variation in home-range size in some *Anolis* lizards.  
732 *Ecology* 63:809–823
- 733 Simon VB (2011) Communication signal rates predict interaction outcome in the brown anole lizard,  
734 *Anolis sagrei*. *Copeia* 2011:38–45
- 735 Stamps JA (1977). Social behavior and spacing patterns in lizards. In: Gans C, Tinkle DW (eds)  
736 *Biology of the Reptilia*, vol 7. Ecology and Behaviour A. Academic Press, New York, pp 265–  
737 334
- 738 Stamps JA (1983) Sexual selection, sexual dimorphism, and territoriality. In: Huey R, Pianka ER,  
739 Schoener TW (eds) *Lizard Ecology*. Harvard University Press, Cambridge, pp 169–204
- 740 Stamps JA (1994) Territorial behavior: Testing the assumptions. *Adv Stud Behav* 23:173–231
- 741 Stamps JA (1995) Using growth-based models to study behavioral factors affecting sexual size  
742 dimorphism. *Herpetol Monogr* 9:75–87

- 743 Tang-Martinez Z (2016) Rethinking Bateman's principles: Challenging persistent myths of sexually  
744 reluctant females and promiscuous males. *J Sex Res* 53:532–559
- 745 Tang-Martinez Z, Ryder TB (2005) The problem with paradigm: Bateman's worldview as a case  
746 study. *Integr Comp Biol* 45:821–830
- 747 Tewksbury JJ, Anderson JGT, Bakker JD et al (2014) Natural history's place in science and society.  
748 *Bioscience* 64:300–310
- 749 Thompson FG (1954) Notes on the behavior of the lizard *Anolis carolinensis*. *Copeia* 1954:299
- 750 Tinbergen N (1957) The functions of territory. *Bird Study* 4:14–27
- 751 Tokarz RR (1998) Mating pattern in the lizard *Anolis sagrei*: Implications for mate choice and sperm  
752 competition. *Herpetologica* 54:388–394
- 753 Tokarz RR (2008) Males distinguish between former female residents of their territories and  
754 unfamiliar nonresident females as preferred mating partners in the lizard *Anolis sagrei*. *J*  
755 *Herpetol* 42:260–264
- 756 Tokarz RR, McMann S, Seitz L, John-Alder H (1998) Plasma corticosterone and testosterone levels  
757 during the annual reproductive cycle of male brown anoles (*Anolis sagrei*). *Physiol Zool*  
758 71:139–146
- 759 Trivers RL (1976) Sexual selection and resource-accruing abilities in *Anolis garmani*. *Evolution*  
760 30:253–269
- 761 Uller T, Olsson M (2008) Multiple paternity in reptiles: patterns and processes. *Mol Ecol* 17:2566–  
762 2580
- 763 Webster R, Greenberg N (1988) Territoriality and social dominance in the green anole lizard. *Am*  
764 *Zool* 28:A73
- 765

766

## 767 Appendix: Papers examined

768 A list of all the papers examined in our historical investigation of territorial polygyny in *Anolis*  
769 lizards, in alphabetical order. We searched for papers on Web of Science using keywords “*Anolis*” or  
770 “*Norops*” and “territor\*”. From the results, we selected papers that were directly relevant to *Anolis*  
771 territoriality, in that the authors studied male-male aggression or site fidelity, including mapping  
772 home ranges, or based their study or discussion of *Anolis* social or reproductive behavior on prior  
773 conclusions of territoriality. We also followed relevant citations from within the sampled papers,  
774 yielding a set of 106 papers that spanned over nine decades and included field- and lab-based  
775 studies, as well as conceptual papers and reviews.

- 776 1. Alworth, T.J. 1986. Perch availability and season affect aggression levels in the territorial lizard,  
777 *Anolis carolinensis*. *American Zoologist* 26: 1041.
- 778 2. Andrews, R.M. 1985. Male choice by females of the lizard, *Anolis carolinensis*. *Journal of*  
779 *Herpetology* 19: 284–289.
- 780 3. Brach, V. 1976. Habits and food of *Anolis equestris* in Florida. *Copeia* 1976: 187–189.
- 781 4. Bull, C.M. 2000. Monogamy in lizards. *Behavioural Processes* 51: 7–20.
- 782 5. Bush, J.M., M.M. Quinn, E.C. Balreira, M.A. Johnson. 2016. How do lizards determine  
783 dominance? Applying ranking algorithms to animal social behaviour. *Animal Behaviour* 118:  
784 65–74.
- 785 6. Calsbeek, R. 2009. Sex-specific adult dispersal and its selective consequences in the brown  
786 anole, *Anolis sagrei*. *Journal of Animal Ecology* 78: 617–624.
- 787 7. Calsbeek, R., C. Bonneaud, S. Prabhu, N. Manoukis, and T.B. Smith. 2007. Multiple paternity  
788 and sperm storage lead to increased genetic diversity in *Anolis* lizards. *Evolutionary Ecology*  
789 *Research* 9: 495–503.
- 790 8. Calsbeek, R., W. Buermann, and T.B. Smith. 2009. Parallel shifts in ecology and natural  
791 selection in an island lizard. *BMC Evolutionary Biology* 9: 3.
- 792 9. Calsbeek, R., and E. Marnocha. 2006. Context dependent territory defense: the importance of  
793 habitat structure in *Anolis sagrei*. *Ethology* 112: 537–543.
- 794 10. Calsbeek, R., and T.B. Smith. 2007. Probing the adaptive landscape using experimental islands:  
795 density-dependent natural selection on lizard body size. *Evolution* 61: 1052–1061.
- 796 11. Carpenter, C.R. 1958. Territoriality: A review of concepts and problems. Pp. 224–250 *In* A.  
797 Roe, and G.G. Simpson (eds.) *Behavior and Evolution*. Yale University Press, New Haven, CT,  
798 USA.
- 799 12. Charles, G.K., and T.J. Ord. 2012. Factors leading to the evolution and maintenance of a male  
800 ornament in territorial species. *Behavioral Ecology and Sociobiology* 66: 231–239.
- 801 13. Colnaghi, G.L. 1971. Partitioning of a restricted food source in a territorial iguanid (*Anolis*  
802 *carolinensis*). *Psychonomic Science* 23: 59–60.
- 803 14. Crews, D. 1980. Studies in squamate sexuality. *BioScience* 30: 835–838.
- 804 15. Crews, D., and N. Greenberg. 1981. Function and causation of social signals in lizards.  
805 *American Zoologist* 21: 273–294.
- 806 16. Decourcy, K.R., and T.A. Jenssen. 1994. Structure and use of male territorial headbob signals  
807 by the lizard *Anolis carolinensis*. *Animal Behaviour* 47: 251–262.

- 808 17. Eason, P.K., and J.A. Stamps. 1992. The effect of visibility on territory size and shape.  
809 Behavioral Ecology 3: 166–172.
- 810 18. Evans, L.T. 1936a. Social behavior of the normal and castrated lizard, *Anolis carolinensis*.  
811 Science 83: 104.
- 812 19. Evans, L.T. 1936b. Territorial behavior of normal and castrated females of *Anolis carolinensis*.  
813 Pedagogical Seminary and Journal of Genetic Psychology 49: 49–60.
- 814 20. Evans, L.T. 1936c. A study of a social hierarchy in the lizard *Anolis carolinensis*. Pedagogical  
815 Seminary and Journal of Genetic Psychology 48: 88–111.
- 816 21. Evans, L.T. 1938a. Cuban field studies on the territoriality of the lizard *Anolis sagrei*. Journal of  
817 Comparative Psychology 25: 97–125.
- 818 22. Evans, L.T. 1938b. Courtship behavior and sexual selection of *Anolis*. Journal of Comparative  
819 Zoology 26: 475–497.
- 820 23. Everly, A., L.M. Sievert, and R.B. Thomas. 2011. Dear enemy recognition in captive brown  
821 anoles. Journal of Kansas Herpetology 40: 13–16.
- 822 24. Farrell, W.J., and W. Wilczynski. 2006. Aggressive experience alters place preference in green  
823 anole lizards, *Anolis carolinensis*. Animal Behaviour 71: 1155–1164.
- 824 25. Fitch, H.S. 1976. Sexual size differences in the mainland anoles. Occasional papers of the  
825 Museum of Natural History, the University of Kansas 50: 1–21.
- 826 26. Fitch, H.S., and R.W. Henderson. 1976. A field study of the rock anoles (Reptilia, Lacertilia,  
827 Iguanidae) of Southern Mexico. Journal of Herpetology 10: 303–311.
- 828 27. Fitch, H.S., and R.W. Henderson. 1987. Ecological and ethological parameters in *Anolis*  
829 *baborucoensis*, a species having rudimentary development of the dewlap. Amphibia-Reptilia 8: 69–  
830 80.
- 831 28. Flanagan, S.P., and C.R. Bevier. 2014. Do male activity level and territory quality affect female  
832 association time in the brown anole, *Anolis sagrei*? Ethology 120: 365–374.
- 833 29. Fleishman, L.J. 1988. The social behavior of *Anolis auratus*, a grass anole from Panama. Journal  
834 of Herpetology 22: 13–23.
- 835 30. Fobes, T.M., R. Powell, J.S. Parmerlee Jr., A. Lathrop, and D.D. Smith. 1992. Natural history of  
836 *Anolis cybotes* (Sauria: Polychridae) from an altered habitat in Barahona, Dominican Republic.  
837 Caribbean Journal of Science 28: 200–207.
- 838 31. Forster, G.L., M.J. Watt, W.J. Korzan, K.J. Renner, and C.H. Summers. 2005. Opponent  
839 recognition in male green anoles, *Anolis carolinensis*. Animal Behaviour 69: 733–740.
- 840 32. Gordon, R.E. 1956. The biology and biogeography of *Anolis carolinensis carolinensis* Voight.  
841 Ph.D. Dissertation, Tulane University.
- 842 33. Gorman, G.C. 1969. Intermediate territorial display of a hybrid *Anolis* lizard (Sauria: Iguanidae).  
843 Zeitschrift für Tierpsychologie 26: 390–393.
- 844 34. Greenberg, B., and G.K. Noble. 1944. Social behavior of the American chameleon (*Anolis*  
845 *carolinensis* Voight). Physiological Zoology 17: 392 – 439.
- 846 35. Henningsen, J.P., and D.J. Irschick. 2012. An experimental test of the effect of signal size and  
847 performance capacity on dominance in the green anole lizard. Functional Ecology 26: 3–10.
- 848 36. Harrison, A.S. 2014. The evolution and diversity of the *Anolis* dewlap. Ph.D. Dissertation,  
849 Harvard University.
- 850 37. Hicks, R.M., and R.L. Trivers. 1983. The social behavior of *Anolis valencienni*. Pp. 570 – 595 In  
851 G.J. Rhodin, and K. Miyata. *Recent Advances in Herpetology and Evolutionary Biology*. Museum of  
852 Comparative Zoology, Cambridge, MA, USA.
- 853 38. Jackson, J.F. 1973. Notes on the population biology of *Anolis tropidonotus* in a Honduran  
854 highland pine forest. Journal of Herpetology 7: 309–311.



- 855 39. Jenssen, T.A. 1970. The ethoecology of *Anolis nebulosus* (Sauria, Iguanidae). *Journal of*  
856 *Herpetology*, 4: 1–38.
- 857 40. Jenssen, T.A. 2002. Spatial awareness by the lizard *Anolis cristatellus*: why should a non-ranging  
858 species demonstrate homing behavior? *Herpetologica* 58: 364–371.
- 859 41. Jenssen, T.A., K.R. Decourcy, and J.D. Congdon. 2005. Assessment in contests of male lizards  
860 (*Anolis carolinensis*): how should smaller males respond when size matters? *Animal Behaviour* 69:  
861 1325–1336.
- 862 42. Jenssen, T.A., and P.C. Feeley. 1991. Social behavior of the male anoline lizard *Chamaelinorops*  
863 *barbouri*, with a comparison to *Anolis*. *Journal of Herpetology* 25: 454–462.
- 864 43. Jenssen, T.A., N. Greenberg, and K.A. Hovde. 1995. Behavioral profile of free-ranging male  
865 lizards, *Anolis carolinensis*, across breeding and post-breeding seasons. *Herpetological*  
866 *Monographs* 9: 41–62.
- 867 44. Jenssen, T.A., M.B. Lovern, J.D. Congdon. 2001. Field-testing the protandry based mating  
868 system for the lizard, *Anolis carolinensis*: does the model organism have the right model?  
869 *Behavioral Ecology and Sociobiology* 50: 162–172.
- 870 45. Jenssen, T.A., and S.C. Nunez. 1994. Male and female reproductive cycles of the Jamaican  
871 lizard, *Anolis opalinus*. *Copeia* 1994: 767–780.
- 872 46. Jenssen, T.A., and S.C. Nunez. 1998. Spatial and breeding relationships of the lizard, *Anolis*  
873 *carolinensis*: Evidence of intrasexual selection. *Behaviour* 135: 981–1003.
- 874 47. Jenssen, T.A., K.S. Orrell, and M.B. Lovern. 2000. Sexual dimorphism in aggressive signal  
875 structure and use by a polygynous lizard, *Anolis carolinensis*. *Copeia* 2000: 140–149.
- 876 48. Jiménez, R.R., and J.A. Rodríguez- Rodríguez. 2015. The relationship between perch type and  
877 aggressive behavior in the lizard *Norops polylepis* (Squamata: Dactyloidae). *Phyllomedusa* 14: 43–  
878 51.
- 879 49. Johnson, M.A., L.J. Revell, and J.B. Losos. 2010. Behavioral convergence and adaptive  
880 radiation: effects of habitat use on territorial behavior in *Anolis* lizards. *Evolution* 64: 1151–  
881 1159.
- 882 50. Johnson, M.A. 2007. Behavioral ecology of Caribbean *Anolis* lizards: A comparative approach.  
883 Ph.D. Dissertation, Washington University.
- 884 51. Joyce, T., D.A. Eifler, and R. Powell. 2010. Variable habitat use influences the mating system of  
885 a Lesser Antillean anole. *Amphibia-Reptilia* 31: 395–401.
- 886 52. Kaiser, B.W., and H.R. Mushinsky. 1994. Tail loss and dominance in captive adult male *Anolis*  
887 *sagrei*. *Journal of Herpetology* 28: 342–346.
- 888 53. Lailvaux, S.P., and D.J. Irschick. 2007. The evolution of performance-based male fighting  
889 ability in Caribbean *Anolis* lizards. *The American Naturalist* 170: 573–586.
- 890 54. Leuck, B.E. 1995. Territorial defense by male green anoles: An experimental test of the roles of  
891 residency and resource quality. *Herpetological Monographs* 9: 63–74.
- 892 55. Lister, B.C. 1976. The nature of niche expansion in West Indian *Anolis* lizards II: Evolutionary  
893 components. *Evolution* 30: 677–692.
- 894 56. Lovern, M.B. 2000. Behavioral ontogeny in the free-ranging juvenile male and female green  
895 anoles, *Anolis carolinensis*, in relation to sexual selection. *Journal of Herpetology* 34: 274–281.
- 896 57. McMann, S. 2000. Effects of residence time on displays during territory establishment in a  
897 lizard. *Animal Behaviour* 59: 513–522.
- 898 58. McMann, S., and A.V. Paterson. 2003. The relationship between location and displays in a  
899 territorial lizard. *Journal of Herpetology* 37: 414–416.

- 900 59. McMann, S., and A.V. Paterson. 2012. Display behavior of resident brown anoles (*Anolis sagrei*)  
901 during close encounters with neighbors and non-neighbors. *Herpetological Conservation and*  
902 *Biology* 7: 27–37.
- 903 60. Nicholson, K.E., and P.M. Richards. 2011. Home-range size and overlap within an introduced  
904 population of the Cuban knight anole, *Anolis equestris* (Squamata: Iguanidae). *Phyllomedusa* 10:  
905 65–73.
- 906 61. Noble, G.K., and H.T. Bradley. 1933. The mating behavior of lizards; its bearing on the theory  
907 of sexual selection. *Annals of the New York Academy of Science* 35: 25–100.
- 908 62. Nunez, S.C., T.A. Jenssen, and K. Ermland. 1997. Female activity profile of a polygynous lizard  
909 (*Anolis carolinensis*): Evidence of intersexual asymmetry. *Behaviour* 134: 205–223.
- 910 63. Oliver, J.A. 1948. The anoline lizards of Bimini, Bahamas. *American Museum Novitates* 1383:  
911 1–36.
- 912 64. Orrell, K.S., and T.A. Jenssen. 2002. Male mate choice by the lizard *Anolis carolinensis*: a  
913 preference for novel females. *Animal Behaviour* 63: 1091–1102.
- 914 65. Orrell, K.S., and T.A. Jenssen. 2003. Heterosexual signalling by the lizard *Anolis carolinensis*,  
915 with intersexual comparisons across contexts. *Behaviour* 140: 603–634.
- 916 66. Passek, K.M. 2002. Extra-pair paternity within the female-defense polygyny of the lizard, *Anolis*  
917 *carolinensis*: Evidence of alternative mating strategies. Ph.D. Dissertation, Virginia Polytechnic  
918 Institute.
- 919 67. Paterson, A.V. 1999. Effects of prey availability on perch height of female bark anoles, *Anolis*  
920 *distichus*. *Herpetologica* 55: 242–247.
- 921 68. Paterson, A.V. 2002. Effects of an individual's removal on space use and behavior in territorial  
922 neighborhoods of brown anoles (*Anolis sagrei*). *Herpetologica* 58: 382–393.
- 923 69. Paterson, A.V., and S. McMann. 2004. Differential headbob displays toward neighbors and  
924 nonneighbors in the territorial lizard *Anolis sagrei*. *Journal of Herpetology* 38: 288–291.
- 925 70. Pereira, H.M., S.R. Loarie, and J. Roughgarden. 2002. Monogamy, polygyny and interspecific  
926 interactions in the lizards *Anolis pogus* and *Anolis gingivinus*. *Caribbean Journal of Science* 38:  
927 132–136.
- 928 71. Philibosian, R. 1975. Territorial behavior and population regulation in the lizards, *Anolis acutus*  
929 and *A. cristatellus*. *Copeia* 1975: 428–444.
- 930 72. Qualls, C.P. and R.G. Jaeger. 1991. Dear enemy recognition in *Anolis carolinensis*. *Journal of*  
931 *Herpetology* 25: 361–363.
- 932 73. Rand, A.S. 1967a. Ecology and social organization in the iguanid lizard *Anolis lineatopus*.  
933 *Proceedings of the United States National Museum* 122: 1–79.
- 934 74. Rand, A.S. 1967b. The adaptive significance of territoriality in iguanid lizards. Pp. 106–115 *In*  
935 *Lizard Ecology: A symposium*. University of Missouri Press, Columbia, MO, USA.
- 936 75. Reagan, D.P. 1992. Congeneric species distribution and abundance in a three-dimensional  
937 habitat: the rain forest anoles of Puerto Rico. *Copeia* 1992: 392–403.
- 938 76. Ruby, D.E. 1984. Male breeding success and differential access to females in *Anolis carolinensis*.  
939 *Herpetologica* 40: 272–280.
- 940 77. Ruibal, R., and R. Philibosian. 1974a. The population ecology of the lizard *Anolis acutus*.  
941 *Ecology* 55: 525–537.
- 942 78. Ruibal, R., and R. Philibosian. 1974b. Aggression in the lizard *Anolis acutus*. *Copeia* 1974: 349–  
943 357.
- 944 79. Schoener, T.W. 1981. An empirically based estimate of home range. *Theoretical Population*  
945 *Biology* 20: 281–325.

- 946 80. Schoener, T.W., and A. Schoener. 1980. Densities, sex ratios, and population structure in four  
947 species of Bahamian *Anolis* lizards. *Journal of Animal Ecology* 49: 19–53.
- 948 81. Schoener, T.W., and A. Schoener. 1982. Intraspecific variation in home-range size in some  
949 *Anolis* lizards. *Ecology* 63: 809–823.
- 950 82. Schoener, T.W., and A. Schoener. 1982. The ecological correlates of survival in some Bahamian  
951 *Anolis* lizards. *Oikos* 39: 1–16.
- 952 83. Sexton, O.J., H.F. Heatwole, and E.H. Meseth. 1963. Seasonal population changes in the lizard,  
953 *Anolis limifrons*, in Panama. *The American Midland Naturalist* 69: 482–491.
- 954 84. Simon, V.B. 2011. Communication signal rates predict interaction outcome in the brown anole  
955 lizard, *Anolis sagrei*. *Copeia* 2011: 38–45.
- 956 85. Stamps, J.A. 1973. Displays and social organization in female *Anolis aeneus*. *Copeia* 1973: 264–  
957 272.
- 958 86. Stamps, J.A. 1977a. The relationship between resource competition, risk, and aggression in a  
959 tropical territorial lizard. *Ecology* 58: 349–358.
- 960 87. Stamps, J.A. 1977b. Social behavior and spacing patterns in lizards. Pp. 265–334 *In* C. Gans,  
961 and D.W. Tinkle (eds.) *Biology of the Reptilia. Volume 7. Ecology and Behaviour A*. Academic Press  
962 Inc., New York, NY, USA.
- 963 88. Stamps, J.A. 1978. A field study of the ontogeny of social behavior in the lizard *Anolis aeneus*.  
964 *Behaviour* 66: 1–31.
- 965 89. Stamps, J.A. 1983. Sexual selection, sexual dimorphism, and territoriality. Pp. 169–204 *In* R.  
966 Huey, E.R. Pianka, and T.W. Schoener (eds.) *Lizard Ecology*. Harvard University Press,  
967 Cambridge, MA, USA.
- 968 90. Stamps, J.A. 1994. Territorial behavior: Testing the assumptions. *Advances in the Study of*  
969 *Behavior* 23: 173–231.
- 970 91. Stamps, J.A. 1995. Using growth-based models to study behavioral factors affecting sexual size  
971 dimorphism. *Herpetological Monographs* 9: 75–87.
- 972 92. Stamps, J.A. 1999. Relationships between female density and sexual size dimorphism in samples  
973 of *Anolis sagrei*. *Copeia* 1999: 760–765.
- 974 93. Stamps, J.A. 2001. Learning from lizards. Pp. 149–168 *In* L.A. Dugatkin (ed.) *Model Systems in*  
975 *Behavioral Ecology: Integrating Conceptual, Theoretical and Empirical Approaches*. Princeton University  
976 Press, Princeton, NJ, USA.
- 977 94. Stamps, J.A., J.B. Losos, and R.M. Andrews. 1997. A comparative study of population density  
978 and sexual size dimorphism in lizards. *The American Naturalist* 149: 64–90.
- 979 95. Stamps, J.A., V.V. Krishnan, and R.M. Andrews. 1994. Analysis of sexual size dimorphism  
980 using null growth-based models. *Copeia* 1994: 598–613.
- 981 96. Talbot, J.J. 1979. Time budget, niche overlap, inter- and intraspecific aggression in *Anolis humilis*  
982 and *A. limifrons* from Costa Rica. *Copeia* 1979: 472–481.
- 983 97. Thompson, F.G. 1954. Notes on the behavior of the lizard *Anolis carolinensis*. *Copeia* 1954: 299.
- 984 98. Tokarz, R.R. 1985. Body size as a factor determining dominance in staged agonistic encounters  
985 between male brown anoles (*Anolis sagrei*). *Animal Behaviour* 33: 746–753.
- 986 99. Tokarz, R.R. 1995. Mate choice in lizards: A review. *Herpetological Monographs* 9: 17–40.
- 987 100. Tokarz, R.R. 1998. Mating pattern in the lizard *Anolis sagrei*: Implications for mate choice and  
988 sperm competition. *Herpetologica* 54: 388–394.
- 989 101. Tokarz, R.R. 2008. Males distinguish between former female residents of their territories and  
990 unfamiliar nonresident females as preferred mating partners in the lizard *Anolis sagrei*. *Journal of*  
991 *Herpetology* 42: 260–264.



- 992 102. Tokarz, R.R., S. McMann, L. Seitz, and H. John-Alder. 1998. Plasma corticosterone and  
993 testosterone levels during the annual reproductive cycle of male brown anoles (*Anolis sagrei*).  
994 *Physiological Zoology* 71: 139–146.
- 995 103. Tokarz, R.R., A.V. Paterson, and S. McMann. 2003. Laboratory and field test of the functional  
996 significance of the male's dewlap in the lizard *Anolis sagrei*. *Copeia* 2003: 502–511.
- 997 104. Trivers, R.L. 1976. Sexual selection and resource-accruing abilities in *Anolis garmani*. *Evolution*  
998 30: 253–269.
- 999 105. Webster, R. and N. Greenberg. 1988. Territoriality and social dominance in the green anole  
1000 lizard. *American Zoologist* 28: A73.
- 1001 106. Yang, E., S.M. Phelps, D. Crews, and W. Wilczynski. 2001. The effects of social  
1002 experience on aggressive behavior in the green anole lizard (*Anolis carolinensis*). *Ethology*  
1003 107: 777–793.
